# Supplementary material
Source: PubMed Central journal article supplement (PMC3277239)

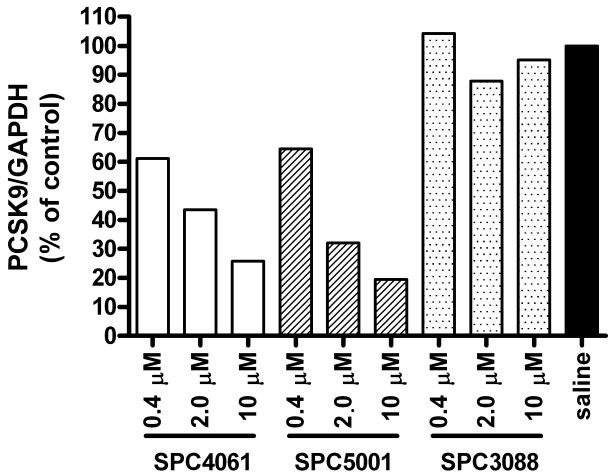

Supplement: mt2011260x1.pdf [file mt2011260x1.pdf]

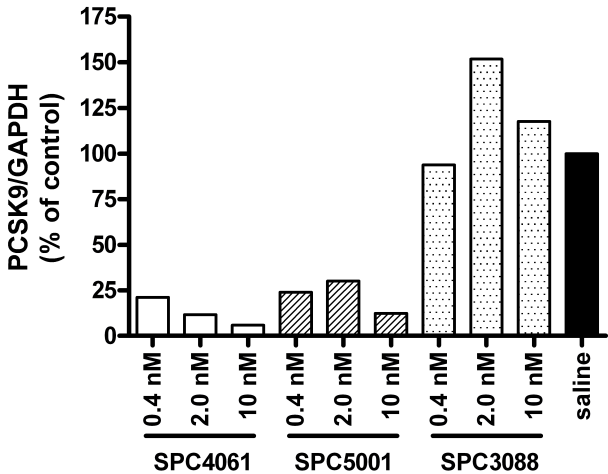

Supplement: mt2011260x2.pdf [file mt2011260x2.pdf]

Control

SPC5001

SPC4061

~150 kDa

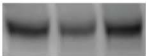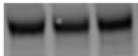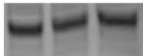

LDLR

~55 kDa

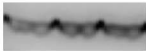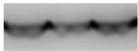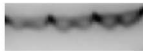

Tubulin

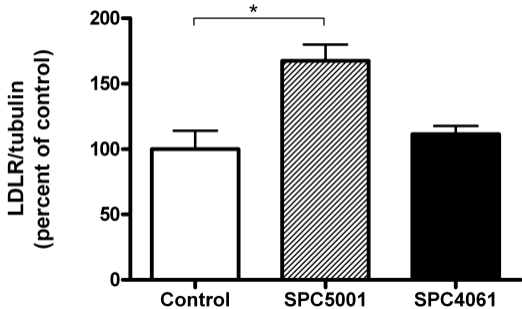

Supplement: mt2011260x3.pdf [file mt2011260x3.pdf]
